# Supplementary material for: Genome-Wide Survey and Expression Analysis of the Plant-Specific NAC Transcription Factor Family in Soybean During Development and Dehydration Stress
Source: PubMed Central journal article supplement — DNA Res. 2011 Jun 18;18(4):263–76. doi: 10.1093/dnares/dsr015 (PMC3158466; doi:10.1093/dnares/dsr015), 2011-06-18
Supplement: supp_dsr015_dsr015supp_figs.pdf [file supp_dsr015_dsr015supp_figs.pdf]

Table with columns for protein IDs (e.g., G1yaa0100880), sequence motifs (e.g., MRSKINSLNVS...), and numerical values (e.g., 102, 63, 56). The table lists numerous entries with varying sequence lengths and associated values.

Table with 3 columns: Gene ID (e.g., G1yma0100880), Protein Name (e.g., VTRDGLSRHRPSPAATCRRRRIQNECDLGGGEPRHRK), and Accession Number (e.g., 196). The table lists numerous protein entries with their corresponding amino acid sequences and identifiers.

Glyma01g00800 : ---EGE...VGI : 300  
Glyma01g00580 : ---PY... : 262  
Glyma01g00510 : ---D... : 262  
Glyma01g02510 : ---D... : 262  
Glyma01g03710 : ---E... : 262  
Glyma02g07700 : ---T... : 213  
Glyma02g07760 : ---A... : 213  
Glyma02g11140 : ---D... : 285  
Glyma02g11900 : ---P... : 262  
Glyma02g12220 : ---G... : 191  
Glyma02g2460 : ---H... : 191  
Glyma02g38710 : ---G... : 272  
Glyma02g40750 : ---G... : 256  
Glyma03g35570 : ---L... : 226  
Glyma04g03320 : ---H... : 273  
Glyma04g13660 : ---L... : 238  
Glyma04g33270 : ---K... : 220  
Glyma04g38560 : ---N... : 185  
Glyma04g3990 : ---H... : 260  
Glyma04g39140 : ---V... : 229  
Glyma04g40450 : ---G... : 273  
Glyma04g42800 : ---N... : 196  
Glyma05g0930 : ---G... : 273  
Glyma05g04250 : ---Q... : 233  
Glyma05g09110 : ---D... : 267  
Glyma05g23840 : ---C... : 262  
Glyma05g24310 : ---G... : 262  
Glyma05g32470 : ---I... : 237  
Glyma05g32590 : ---R... : 163  
Glyma05g3350 : ---T... : 194  
Glyma05g3580 : ---S... : 273  
Glyma05g36030 : ---E... : 239  
Glyma05g38380 : ---V... : 180  
Glyma06g0440 : ---S... : 238  
Glyma06g11970 : ---N... : 196  
Glyma06g14290 : ---G... : 268  
Glyma06g15840 : ---V... : 229  
Glyma06g15990 : ---S... : 161  
Glyma06g16440 : ---N... : 185  
Glyma06g17480 : ---Y... : 180  
Glyma06g21020 : ---K... : 236  
Glyma06g35660 : ---A... : 262  
Glyma06g38410 : ---A... : 191  
Glyma06g38440 : ---R... : 220  
Glyma06g47680 : ---F... : 243  
Glyma07g05610 : ---P... : 247  
Glyma07g05370 : ---R... : 247  
Glyma07g05660 : ---G... : 257  
Glyma07g35630 : ---G... : 193  
Glyma07g40140 : ---K... : 265  
Glyma08g01280 : ---V... : 265  
Glyma08g03590 : ---E... : 230  
Glyma08g04610 : ---K... : 220  
Glyma08g08010 : ---K... : 158  
Glyma08g16630 : ---L... : 273  
Glyma08g17140 : ---A... : 215  
Glyma08g18050 : ---N... : 242  
Glyma08g18470 : ---G... : 211  
Glyma08g19300 : ---K... : 264  
Glyma08g41260 : ---L... : 200  
Glyma08g41990 : ---H... : 173  
Glyma08g47320 : ---H... : 222  
Glyma08g92760 : ---L... : 238  
Glyma09g31650 : ---K... : 225  
Glyma09g36600 : ---S... : 230  
Glyma09g36820 : ---G... : 242  
Glyma09g37050 : ---C... : 203  
Glyma10g44350 : ---P... : 244  
Glyma10g34130 : ---D... : 260  
Glyma10g36050 : ---E... : 266  
Glyma10g36300 : ---E... : 266  
Glyma11g03340 : ---G... : 226  
Glyma11g07990 : ---Q... : 231  
Glyma11g11070 : ---L... : 266  
Glyma11g16770 : ---L... : 266  
Glyma11g33210 : ---G... : 268  
Glyma12g00760 : ---H... : 256  
Glyma12g02540 : ---K... : 266  
Glyma12g09670 : ---L... : 222  
Glyma12g13710 : ---E... : 238  
Glyma12g22790 : ---N... : 219  
Glyma12g2880 : ---K... : 266  
Glyma12g6190 : ---K... : 251  
Glyma12g29360 : ---I... : 219  
Glyma12g31150 : ---L... : 219  
Glyma12g31210 : ---L... : 238  
Glyma12g33460 : ---E... : 235  
Glyma12g34990 : ---N... : 224  
Glyma12g35000 : ---T... : 194  
Glyma12g3530 : ---T... : 262  
Glyma13g05350 : ---P... : 246  
Glyma13g05540 : ---M... : 224  
Glyma13g18620 : ---R... : 153  
Glyma13g14320 : ---D... : 262  
Glyma13g30800 : ---D... : 259  
Glyma13g31660 : ---N... : 218  
Glyma13g34950 : ---K... : 233  
Glyma13g3550 : ---K... : 191  
Glyma13g35560 : ---N... : 224  
Glyma13g39000 : ---S... : 216  
Glyma13g39160 : ---L... : 227  
Glyma13g40250 : ---S... : 243  
Glyma14g03440 : ---P... : 184  
Glyma14g09240 : ---F... : 191  
Glyma14g20340 : ---Q... : 227  
Glyma14g24220 : ---N... : 191  
Glyma14g36640 : ---G... : 272  
Glyma14g39080 : ---G... : 256  
Glyma15g05690 : ---Q... : 159  
Glyma15g07620 : ---G... : 262  
Glyma15g08480 : ---D... : 248  
Glyma15g40510 : ---K... : 229  
Glyma15g40950 : ---M... : 282  
Glyma15g4180 : ---V... : 243  
Glyma15g42050 : ---A... : 215  
Glyma16g01300 : ---R... : 254  
Glyma16g01930 : ---R... : 244  
Glyma16g01940 : ---S... : 244  
Glyma16g2200 : ---G... : 254  
Glyma16g40720 : ---K... : 280  
Glyma16g4740 : ---S... : 243  
Glyma16g5620 : ---Y... : 181  
Glyma16g24200 : ---Q... : 239  
Glyma16g26740 : ---T... : 213  
Glyma16g26810 : ---N... : 243  
Glyma16g34310 : ---S... : 273  
Glyma17g06560 : ---A... : 222  
Glyma17g10970 : ---K... : 233  
Glyma17g14700 : ---G... : 262  
Glyma17g16500 : ---Q... : 213  
Glyma17g23740 : ---V... : 169  
Glyma17g35930 : ---M... : 192  
Glyma18g0500 : ---D... : 243  
Glyma18g13570 : ---D... : 173  
Glyma18g15020 : ---P... : 256  
Glyma18g49620 : ---S... : 237  
Glyma18g0580 : ---P... : 243  
Glyma19g02850 : ---M... : 223  
Glyma19g08510 : ---E... : 180  
Glyma19g26950 : ---V... : 186  
Glyma19g2750 : ---K... : 260  
Glyma19g36420 : ---R... : 191  
Glyma19g4490 : ---M... : 173  
Glyma19g4910 : ---M... : 173  
Glyma20g0440 : ---V... : 273  
Glyma20g32690 : ---G... : 278  
Glyma20g32690 : ---D... : 290  
Glyma20g3390 : ---T... : 239  
Glyma20g3430 : ---E... : 196  
ANAC03 : ---T... : 196  
ANAC05 : ---T... : 194  
ANAC07 : ---S... : 210





Table with protein identifiers (e.g., Glyma01g00880, Glyma01g05680, Glyma01g06150, Glyma01g22510, Glyma01g37310, Glyma02g07700, Glyma02g07760, Glyma02g11140, Glyma02g11900, Glyma02g12220, Glyma02g26480, Glyma02g39710, Glyma02g40750, Glyma03g35570, Glyma04g08320, Glyma04g13660, Glyma04g33270, Glyma04g38560, Glyma04g38990, Glyma04g39140, Glyma04g40450, Glyma04g42800, Glyma05g00930, Glyma05g04250, Glyma05g09110, Glyma05g23840, Glyma05g24910, Glyma05g32470, Glyma05g32590, Glyma05g32850, Glyma05g35090, Glyma05g36030, Glyma05g38380, Glyma06g08440, Glyma06g11970, Glyma06g14290, Glyma06g15840, Glyma06g15990, Glyma06g16440, Glyma06g17480, Glyma06g21020, Glyma06g35660, Glyma06g38410, Glyma06g38440, Glyma06g47680, Glyma07g05360, Glyma07g05370, Glyma07g05660, Glyma07g10240, Glyma07g15180, Glyma07g32230, Glyma07g39630, Glyma07g40140, Glyma08g01280, Glyma08g03590, Glyma08g04610, Glyma08g08010, Glyma08g16630, Glyma08g17140, Glyma08g18050, Glyma08g18470, Glyma08g19300, Glyma08g41260, Glyma08g41990, Glyma08g47520, Glyma09g29760, Glyma09g31850, Glyma09g36600, Glyma09g36820, Glyma09g37050, Glyma10g04350, Glyma10g34130, Glyma10g36050, Glyma10g36360, Glyma11g03340, Glyma11g07990, Glyma11g10230, Glyma11g18770, Glyma11g39210, Glyma12g00760, Glyma12g02540, Glyma12g09970, Glyma12g19710, Glyma12g22790, Glyma12g22880, Glyma12g26190, Glyma12g29360, Glyma12g31150, Glyma12g31210, Glyma12g33460, Glyma12g34990, Glyma12g35000, Glyma12g35530, Glyma13g05350, Glyma13g09540, Glyma13g18620, Glyma13g24320, Glyma13g30800, Glyma13g31660, Glyma13g34950, Glyma13g35550, Glyma13g35560, Glyma13g39090, Glyma13g39160, Glyma13g40250, Glyma14g03440, Glyma14g09240, Glyma14g20340, Glyma14g24220, Glyma14g36840, Glyma14g39080, Glyma15g05690, Glyma15g07620, Glyma15g08480, Glyma15g40510, Glyma15g40950, Glyma15g41830, Glyma15g42050, Glyma16g01900, Glyma16g01930, Glyma16g01940, Glyma16g02200, Glyma16g04720, Glyma16g04740, Glyma16g05620, Glyma16g24200, Glyma16g26740, Glyma16g26810, Glyma16g34310, Glyma17g00650, Glyma17g10970, Glyma17g14700, Glyma17g16500, Glyma17g23740, Glyma17g35930, Glyma18g05020, Glyma18g13570, Glyma18g19020, Glyma18g49620, Glyma19g02580, Glyma19g02850, Glyma19g08510, Glyma19g26950, Glyma19g28520, Glyma19g36420, Glyma19g44890, Glyma19g44910, Glyma20g04440, Glyma20g31210, Glyma20g32690, Glyma20g33390, Glyma20g33430, ANACO19, ANACO55, ANACO72

**Supplementary Figure S1.** Identification of conserved NAC subdomains and putative nuclear localization signal in 152 identified GmNAC TFs by sequence analysis. Multiple alignment of 152 GmNACs and three representative ANACs. The consensus NAC subdomains (A-E) are indicated by lines above the sequences. The putative nuclear localization signal is shown by a double-headed arrow below the sequence. NAC-like proteins lacking A and B subdomains and C and D subdomains are indicated by red-colored and green-colored lines, respectively, under the name of the proteins. NAC proteins lacking the conserved nuclear localization signal are indicated by red-colored asterisks next to the name of the proteins.

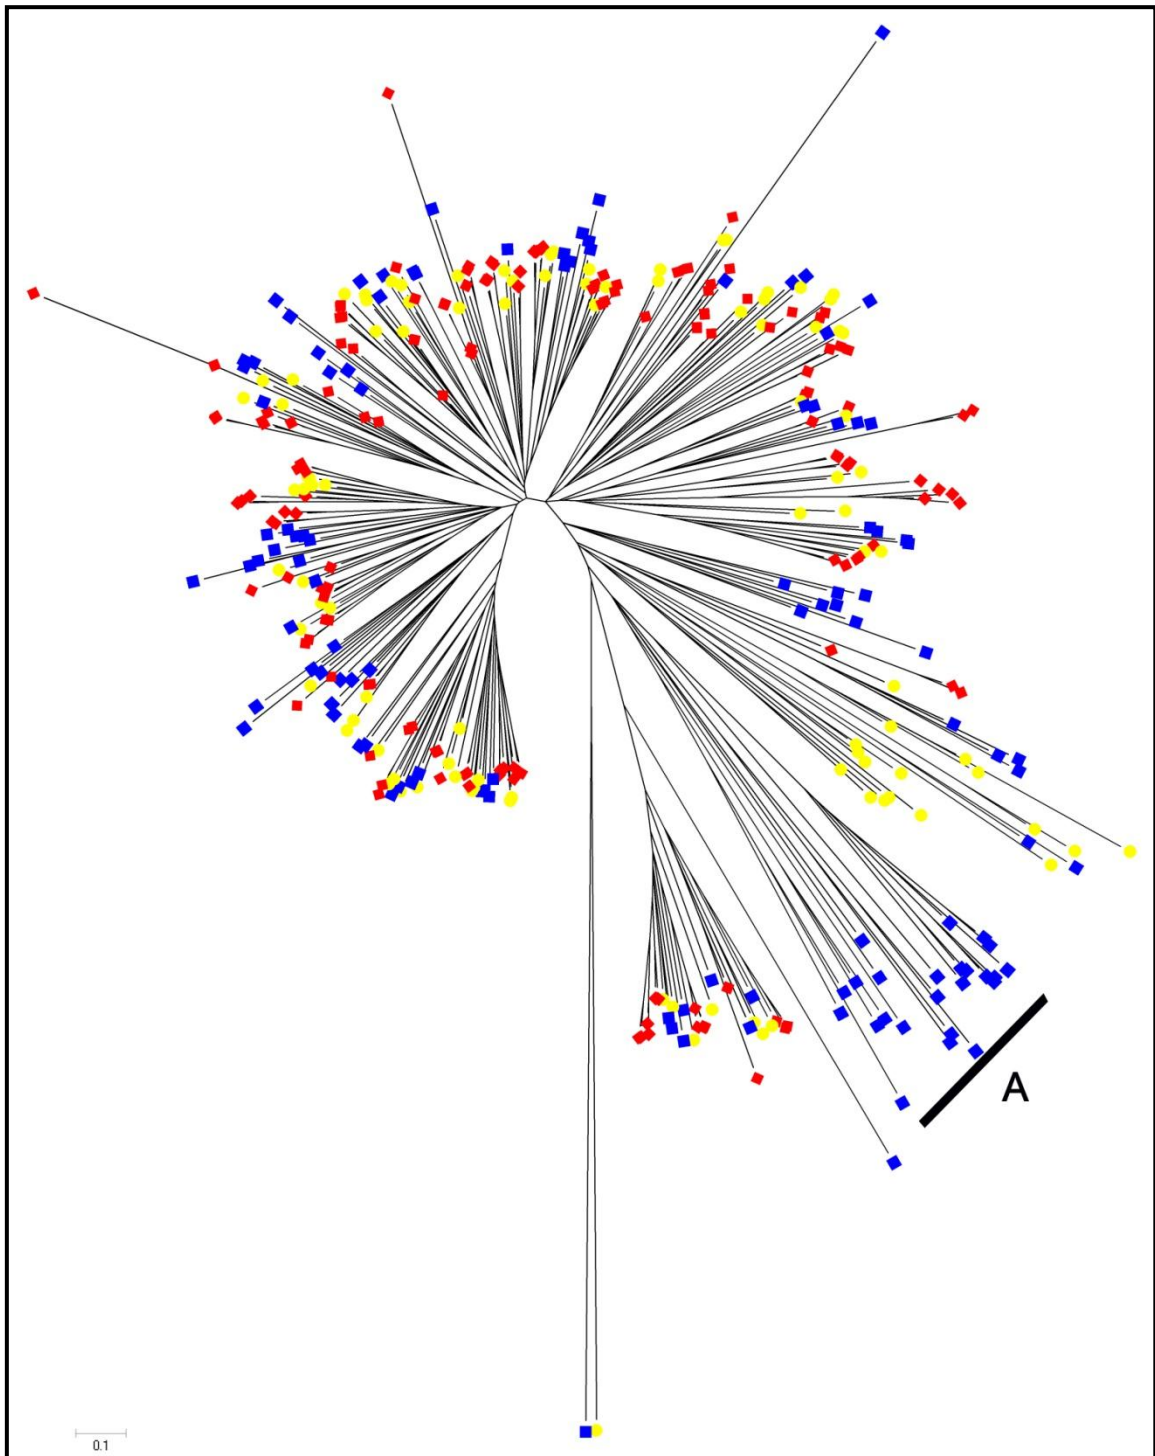

**Supplementary Figure S2.** Phylogenetic relationship of NAC proteins from *Arabidopsis* (yellow), rice (blue) and soybean (red). The unrooted phylogenetic tree was constructed using the full ORFs of NAC proteins. “A” indicates the unique subgroup of ONACs of rice.

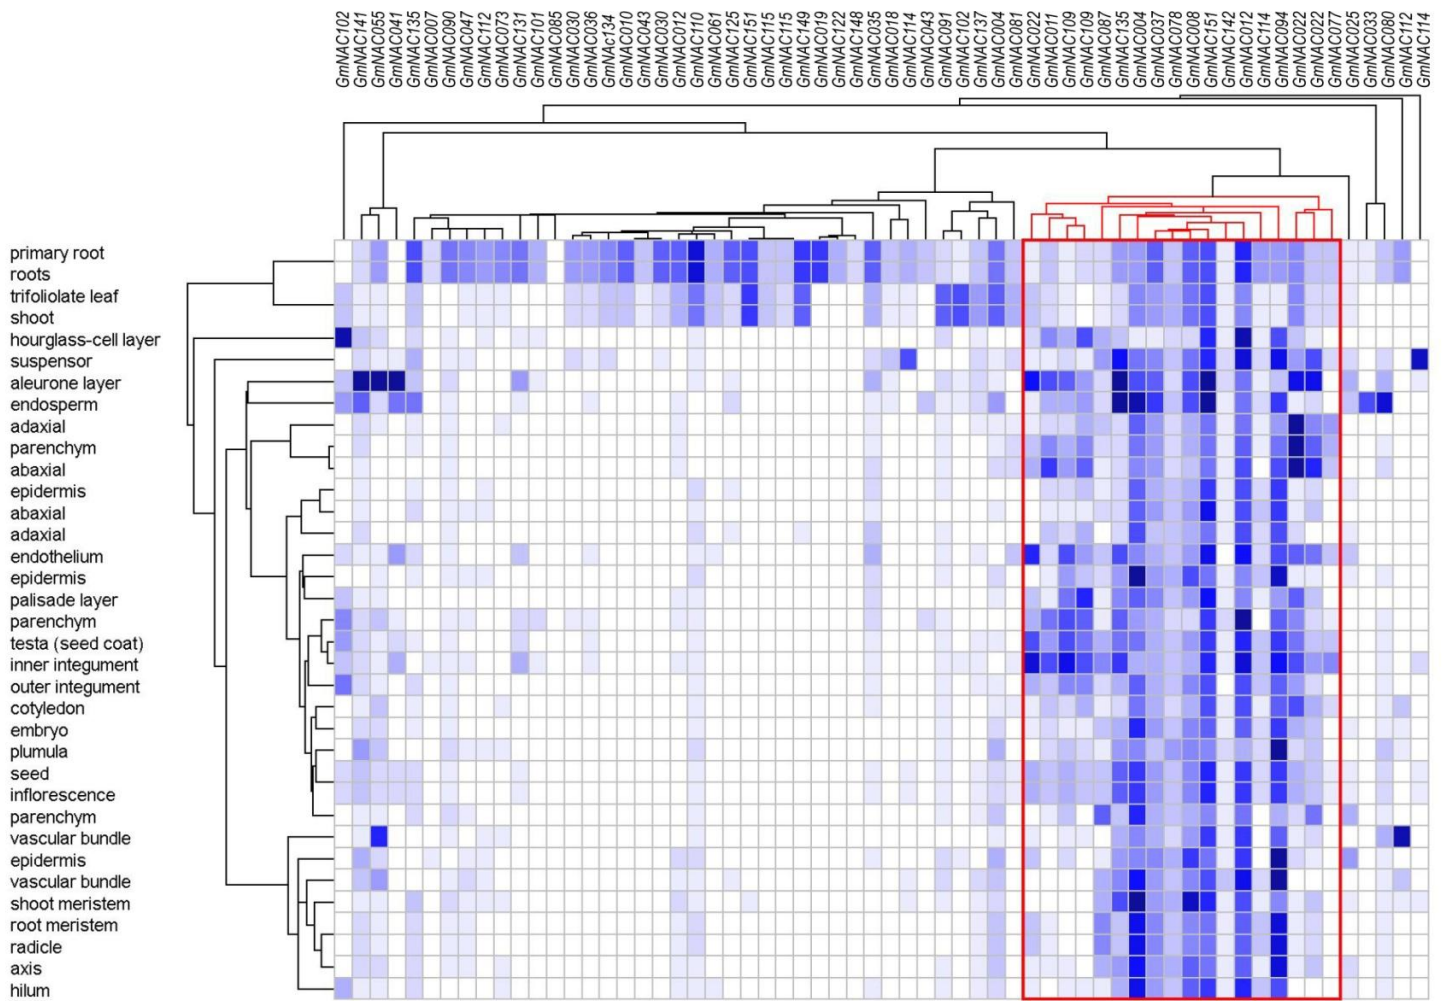

**Supplementary Figure S3.** Heat map representation for tissue-specific expression of 48 *GmNAC* genes in soybean. Expression patterns of the *GmNAC* genes were analyzed using expression data housed within Geninvestigator. Elevated expression levels are indicated by increasing intensities of blue color. A group of *GmNAC* genes that are ubiquitously expressed in the soybean tissues examined is boxed.



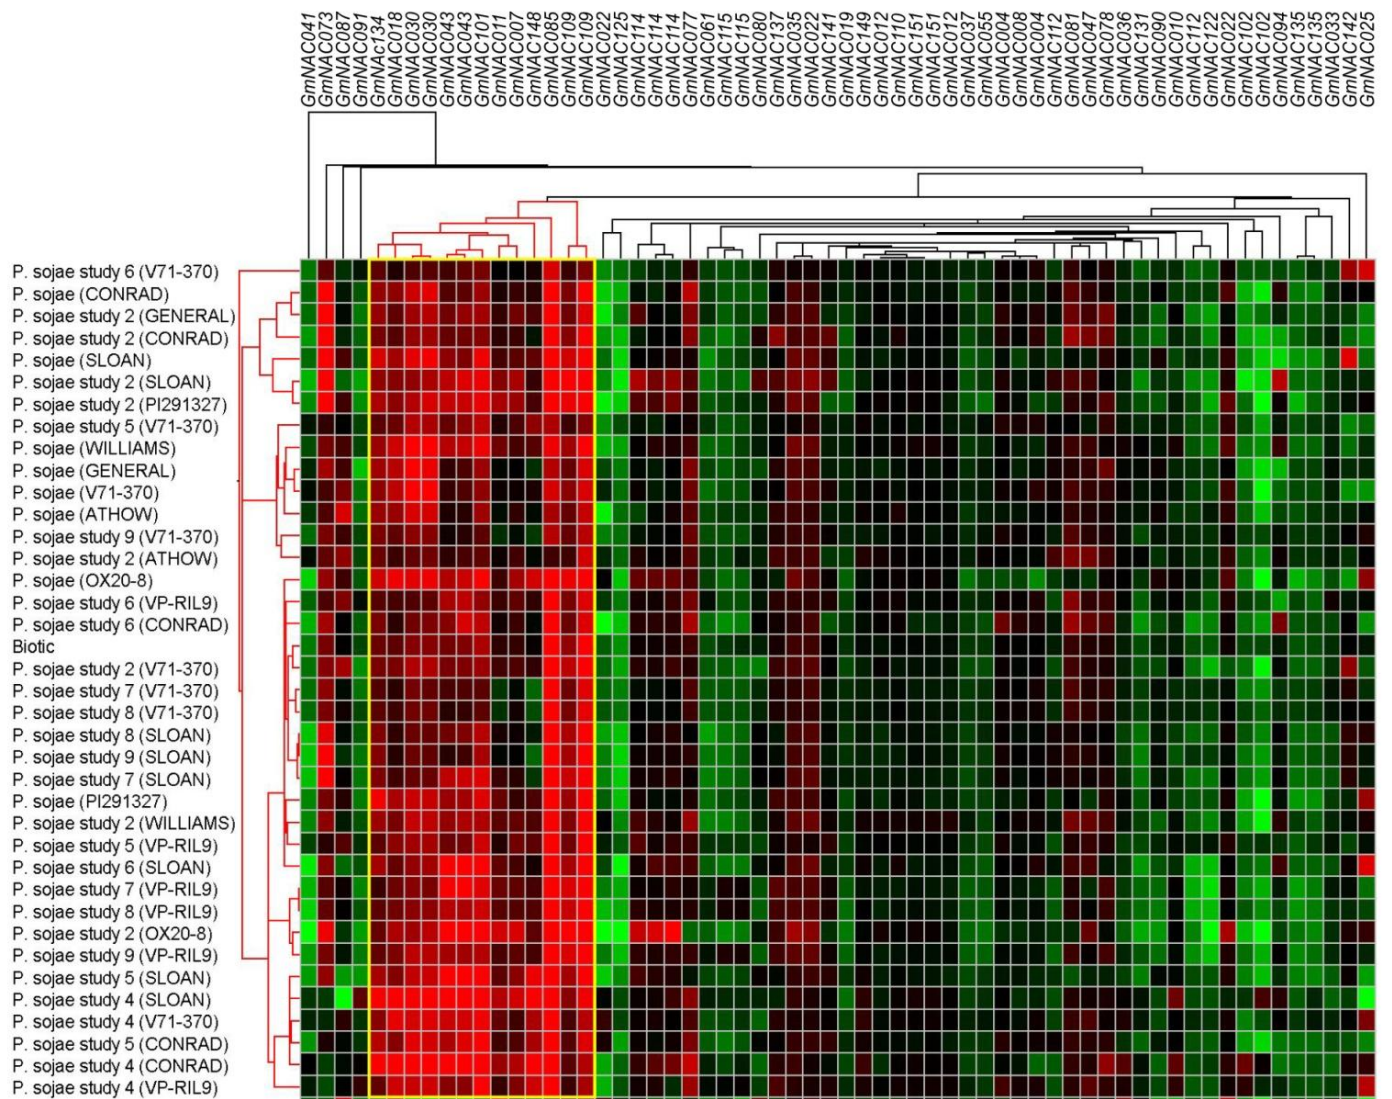

**Supplementary Figure S4.** Heat map representation for the expression of 48 *GmNAC* genes in soybean in response to *P. sojae* infection. Expression patterns of the *GmNAC* genes were analyzed by using expression data housed within Genvestigator. Elevated expression levels are indicated by increasing intensities of blue color. A group of *GmNAC* genes that are highly responsive to *P. sojae* infection in all of the examined conditions is boxed.

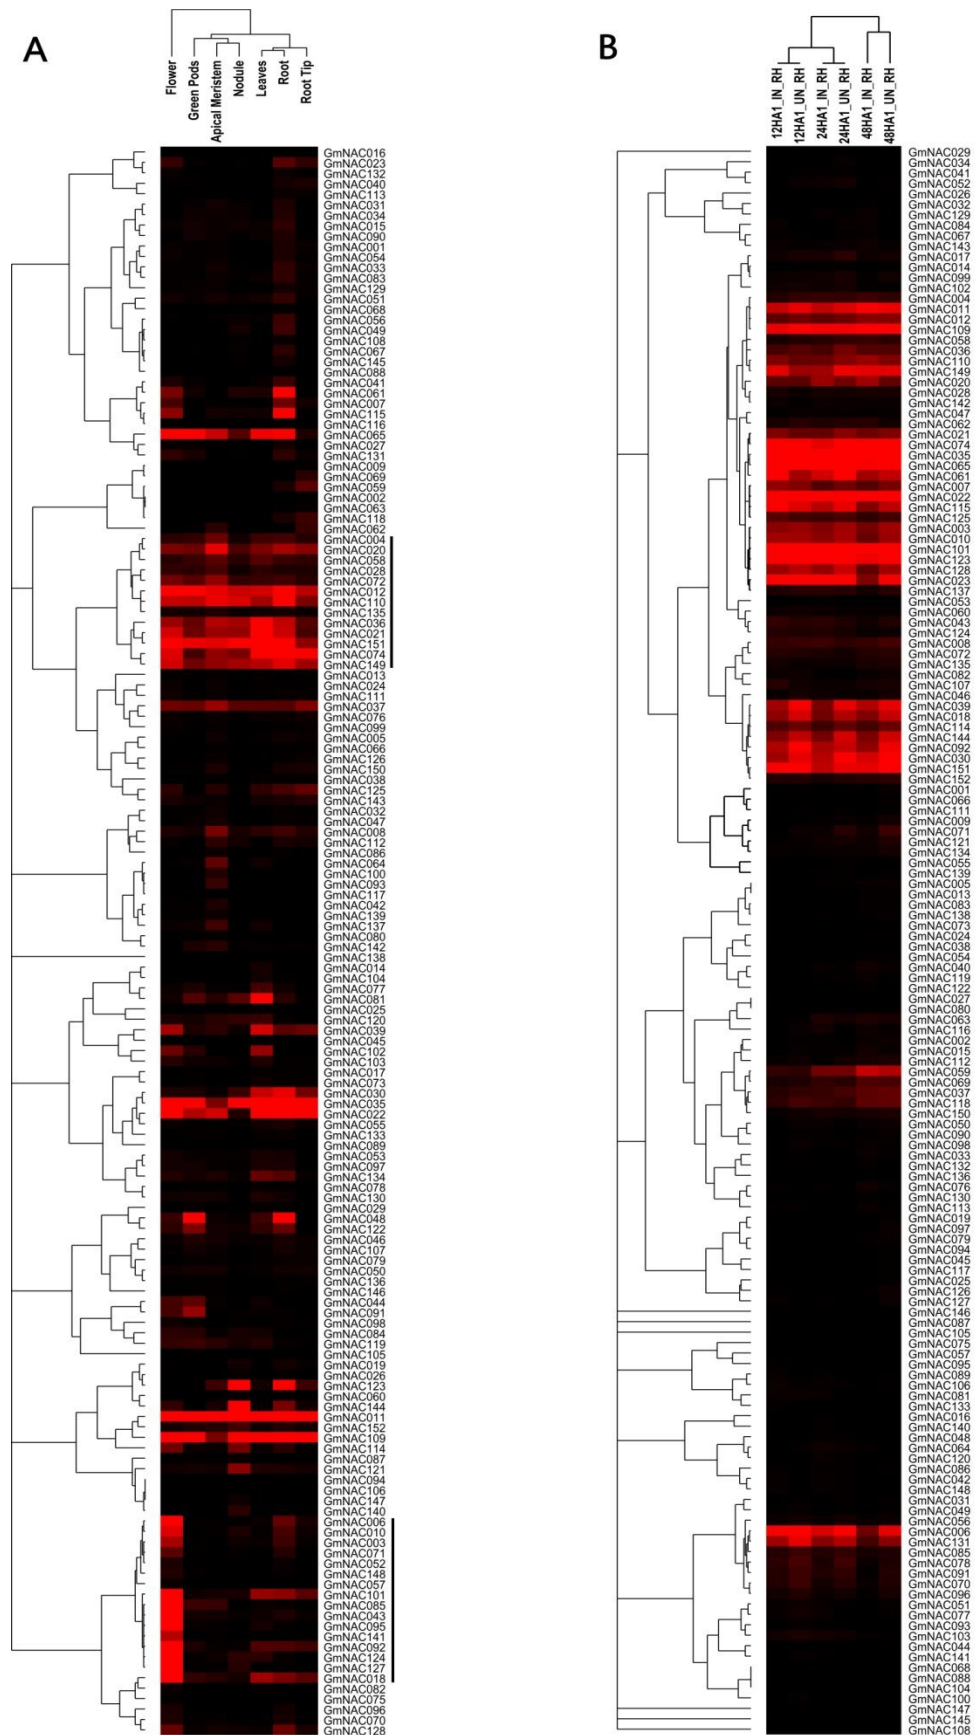

**Supplementary Figure S5.** Heat map representation for the expression of 152 *GmNAC* genes in soybean. Expression patterns of the *GmNAC* genes were analyzed using Illumina transcriptome data. The colors indicate expression intensity (red, high expression; green, low expression; grey, no expression). Lines shown next to the genes indicate clusters of genes which exhibit similar expression patterns. (A) Heat map representation for the expression of 152 *GmNAC* genes in seven different soybean tissues. (B) Heat map representation for the expression of 152 *GmNAC* genes in soybean root hairs (RH) in response to *B. japonicum* inoculation.
